# Supplementary material for: The Depletion of the &ldquo;Don&rsquo;t-Eat-Me&rdquo; Signal CD47 Increases Radiosensitivity through Phenotypical Attenuation of Cancer Stem Cell and EMT Properties in Oral Squamous Cell Carcinoma Cells
Source: Preprints.org preprint supplement (doi:10.20944/preprints201907.0079.v1), 2019-07-04
Supplement: Supplementary file 1 [file supplementary]

## **SUPPLEMENTARY INFORMATION**

### **The depletion of the “don’t-eat-me” signal CD47 increases radiosensitivity through phenotypical attenuation of cancer stem cell and EMT properties in Oral squamous cell carcinoma cells**

Disclosed by Shin Pai, MD<sup>1,2</sup>, Oluwaseun Adebayo Bamodu, MD., PhD<sup>3,4</sup>, Yen-Kuang Lin, PhD<sup>5</sup>, Chun-Shu Lin, MD<sup>1,6</sup>, Pei-Yi Chu, MD., PhD<sup>7</sup>, Ming-Hsien Chien, PhD<sup>1</sup>, Liang-Shun Wang, MD., PhD<sup>1,3,8</sup>, Hsiao M, PhD<sup>9</sup>, Chi-Tai Yeh, PhD<sup>1,3,4\*</sup>, Jo-Ting Tsai, MD., PhD<sup>1, 10,11\*</sup>

Authors' affiliation: <sup>1</sup>Graduate Institute of Clinical Medicine, College of Medicine, Taipei Medical University, Taipei City, Taiwan; <sup>2</sup>Department of Oral & Maxillofacial Surgery, Saint Martin de Parres Hospital, Chaiyi City, Taiwan; <sup>3</sup>Department of Medical Research and Education, Taipei Medical University - Shuang Ho Hospital, New Taipei City, Taiwan; <sup>4</sup>Department of Hematology and Oncology, Cancer Center, Taipei Medical University - Shuang Ho Hospital, New Taipei City, Taiwan; <sup>5</sup> Biostatistics Center, Taipei Medical University, Taipei, Taiwan, ROC; <sup>6</sup>Department of Radiation Oncology, Tri-Service General Hospital, National Defense Medical Center, Taipei, Taiwan; <sup>7</sup>Department of Pathology, Faculty of Medicine, Fu Jen Catholic University, New Taipei City, Taiwan; <sup>8</sup>Department of Thoracic Surgery, Taipei Medical University - Shuang Ho Hospital, New Taipei City, Taiwan; <sup>9</sup>Genomics Research Center, Academia Sinica, Taipei, Taiwan; <sup>10</sup>Department of Radiology, School of Medicine, College of Medicine, Taipei Medical University, Taipei, Taiwan; <sup>11</sup>Department of Radiology, Taipei Medical University - Shuang Ho Hospital, New Taipei City, Taiwan.

\*Corresponding author(s):

Chi-Tai Yeh, PhD., Department of Medical Research and Education, Taipei Medical University - Shuang Ho Hospital, New Taipei City 23561, Taiwan; Tel: +886-2-2490088 ext. 8881, Fax: +886-2-2248-0900, E-mail: [ctyeh@s.tmu.edu.tw](mailto:ctyeh@s.tmu.edu.tw)

Jo-Ting Tsai, MD., PhD., Department of Radiation Oncology, Cancer Center, Taipei Medical University - Shuang Ho Hospital, New Taipei City 23561, Taiwan; Tel: +886-2-2490088 ext. 8885, Fax: +886-2-2248-0900, E-mail: [10576@s.tmu.edu.tw](mailto:10576@s.tmu.edu.tw)

\*Title Page (with author names and affiliations)

**Working title:** Targeting the CD47-CSCs-EMT loop enhances radiosensitivity in OSCC

| <b>No.</b> | <b>Target</b> | <b>Dilution</b> | <b>Catalog</b>                      | <b>kDa</b> |
|------------|---------------|-----------------|-------------------------------------|------------|
| 1          | CD47          | 1:500           | CD47 (B6H12) Mouse mAb SC-12730     | 47         |
| 2          | GAPDH         | 1:500           | GAPDH (0411K) Mouse mAb SC-27724    | 37         |
| 3          | SOX2          | 1:1000          | SOX2 Rabbit mAb #3579T              | 35         |
| 4          | OCT4          | 1:1000          | Oct-4 (C30A3) Rabbit mAb #2840      | 45         |
| 5          | CD133         | 1:1000          | CD133 Rabbit mAb 18470-1-AP         | 120        |
| 6          | Vimentin      | 1:1000          | VimentinRabbit mAb ab137321         | 57         |
| 7          | Slug          | 1:1000          | Slug (C19G7) Rabbit mAb #9585       | 30         |
| 8          | Snail         | 1:1000          | Snail Rabbit mAb #3879P             | 29         |
| 9          | N-cadherin    | 1:500           | N-cadherin Rabbit mAb #4061         | 140        |
| 10         | E-Cadherin    | 1:500           | E-Cadherin (24E10) Rabbit mAb #3195 | 135        |

**Supplementary Table S1.** Western blot antibodies sheet.

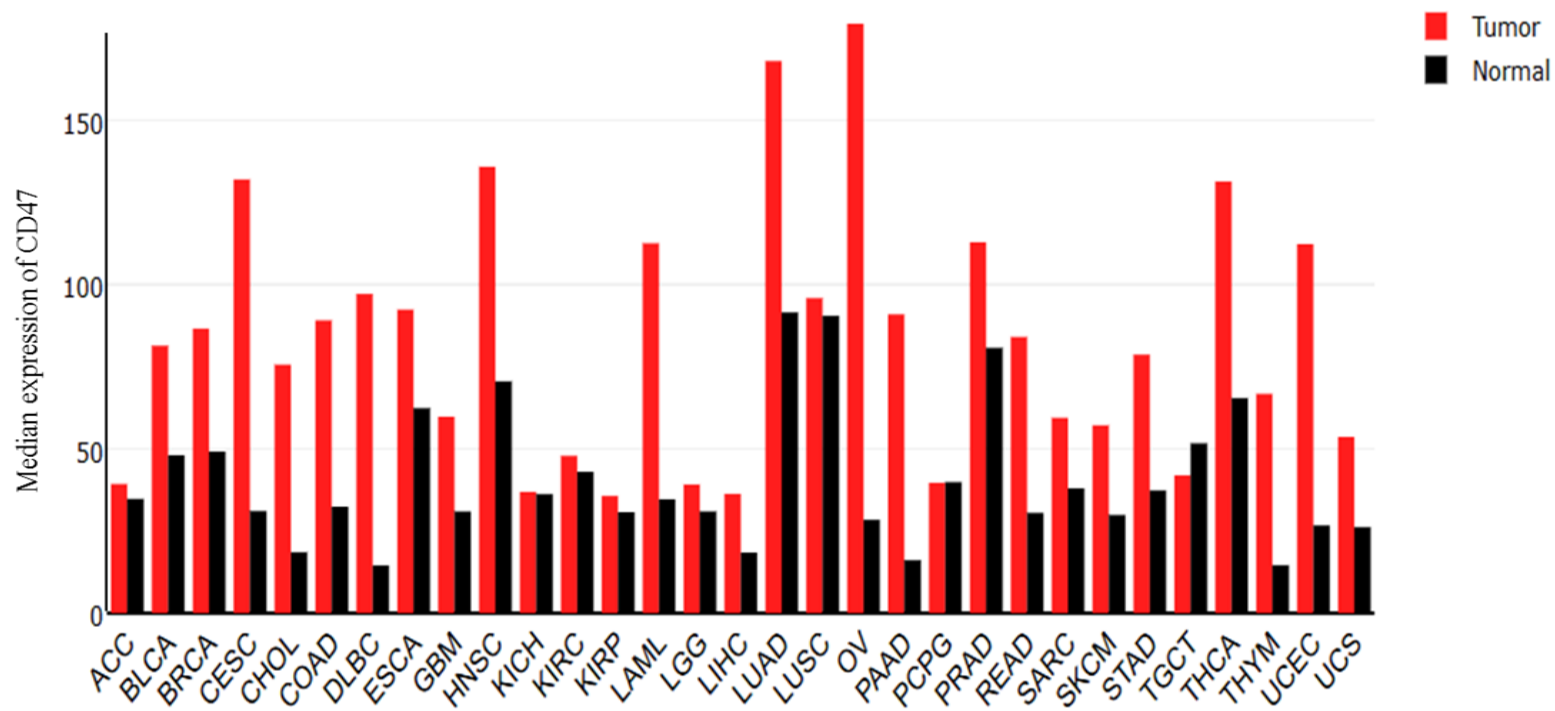

**Supplementary Figure S1. CD47 is aberrantly expressed in human oral squamous cell carcinoma.** Bar plot of the gene expression profile across all paired tumor samples and normal tissues. The bar height represents the median expression of indicated tumor type or normal tissue.

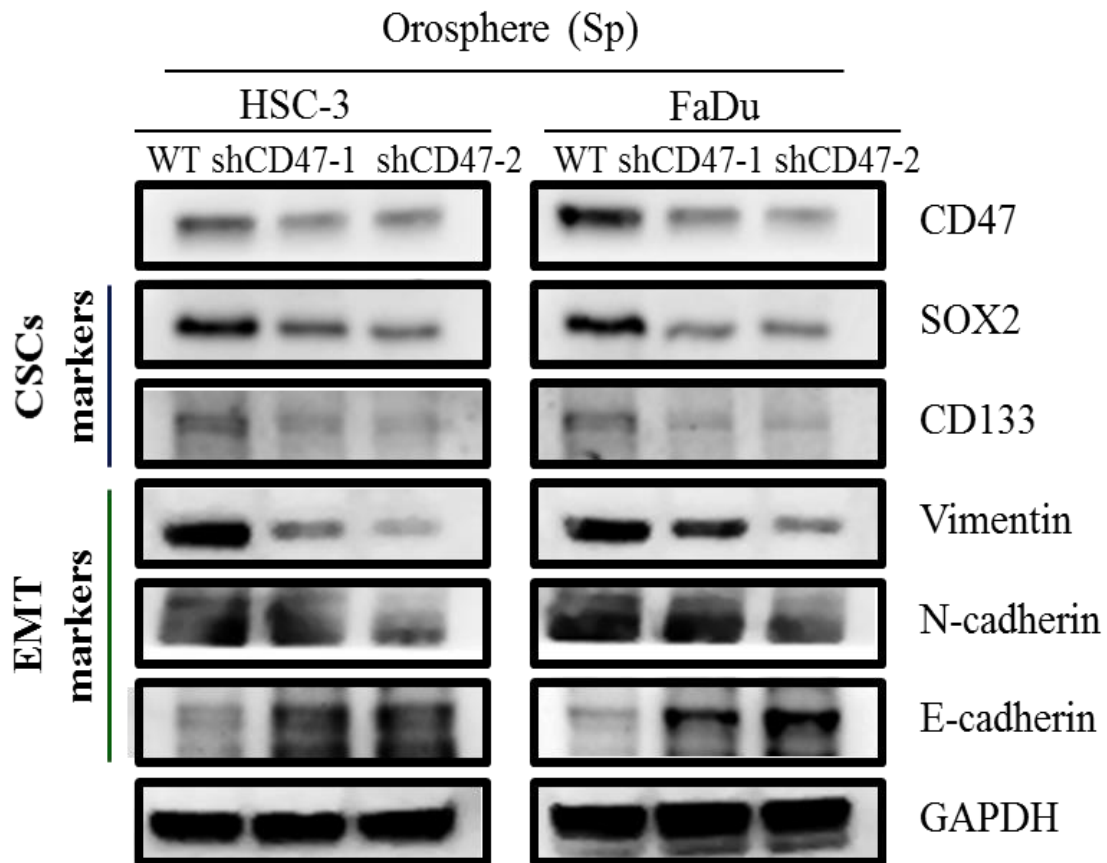

**Supplementary Figure S2. CD47 modulates the cancer stem cell-like and metastatic phenotypes of oral squamous cell carcinoma cells.** The inhibitory effect of shCD47 on the expression level of CD47, Sox2, CD133, vimentin, N-cadherin, and E-cadherin proteins in HSC-3 and FaDu cells as demonstrated by western blot analyses. GAPDH served as loading control.

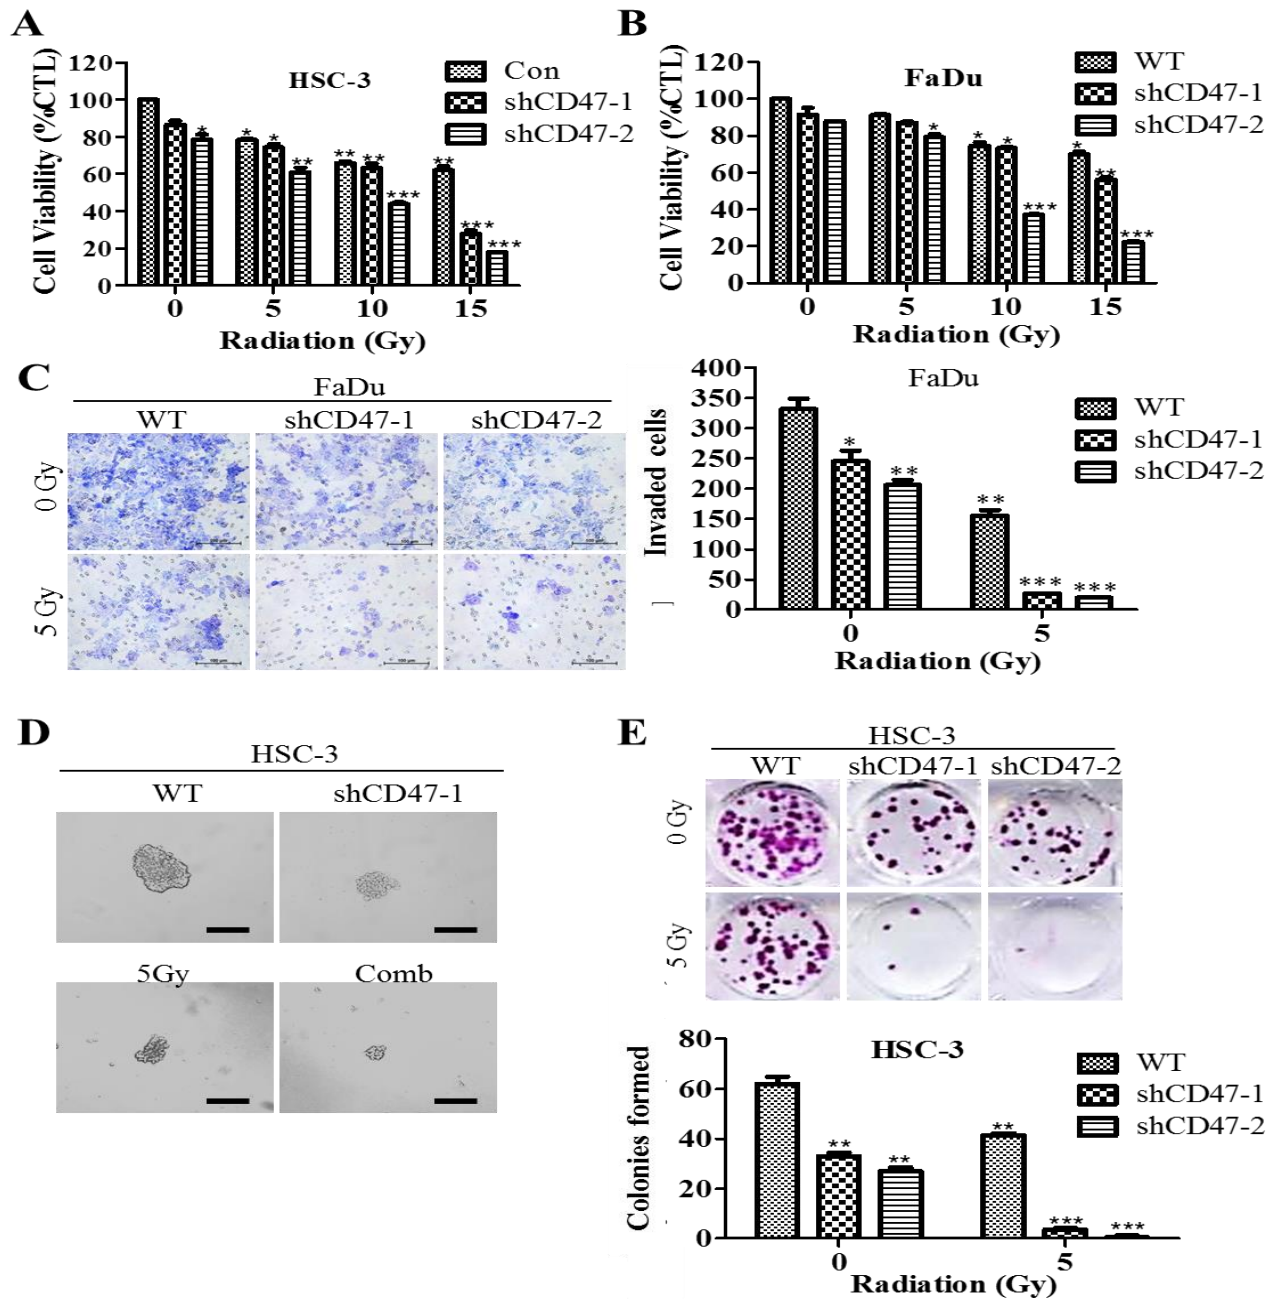

**Supplementary Figure S3. Suppression of CD47 expression enhances the sensitivity of OSCC-SCs to radiation therapy.** shCD47 with or without 0 Gy - 15 Gy radiation decreased the viability of (A) HSC-3 and (B) FaDu cells dose-dependently. (C) Transwell invasion assay images show reduced invasion in 5 Gy-exposed shCD47 FaDu cells, compared to their WT counterparts. (D) shCD47-transfected HSC-3 cells exposed to 5 Gy yielded smaller tumorspheres compared to their WT, shCD47, or 5 Gy alone counterparts. (E) shCD47-1 or shCD47-2 HSC-3 cells formed fewer colonies when exposed to 5 Gy, compared to the WT alone cells. \* $p < 0.05$ , \*\* $p < 0.01$ , \*\*\* $p < 0.001$

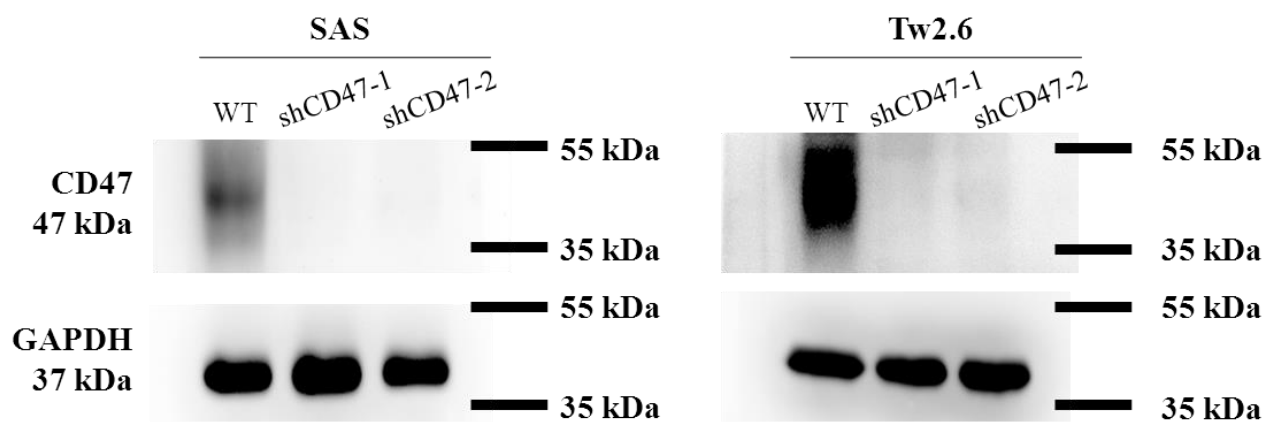

**Supplementary Figure S4.** Full-size blots of Figure 3B

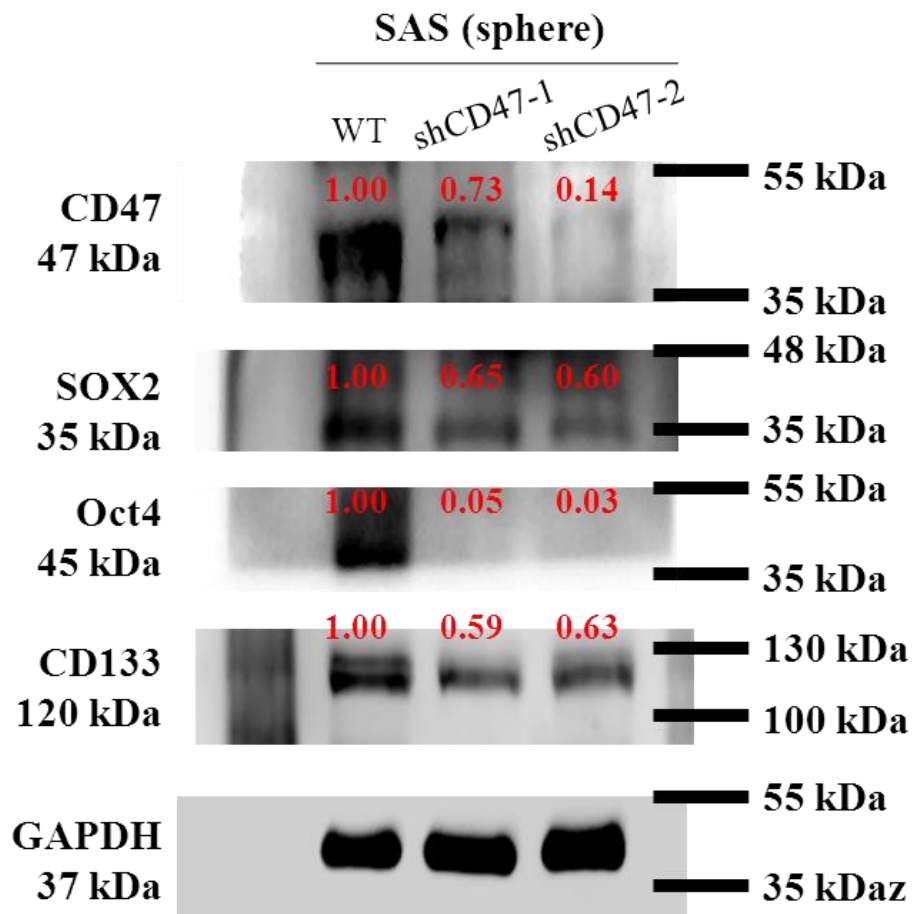

**Supplementary Figure S5.** Full-size blots of Figure 3C



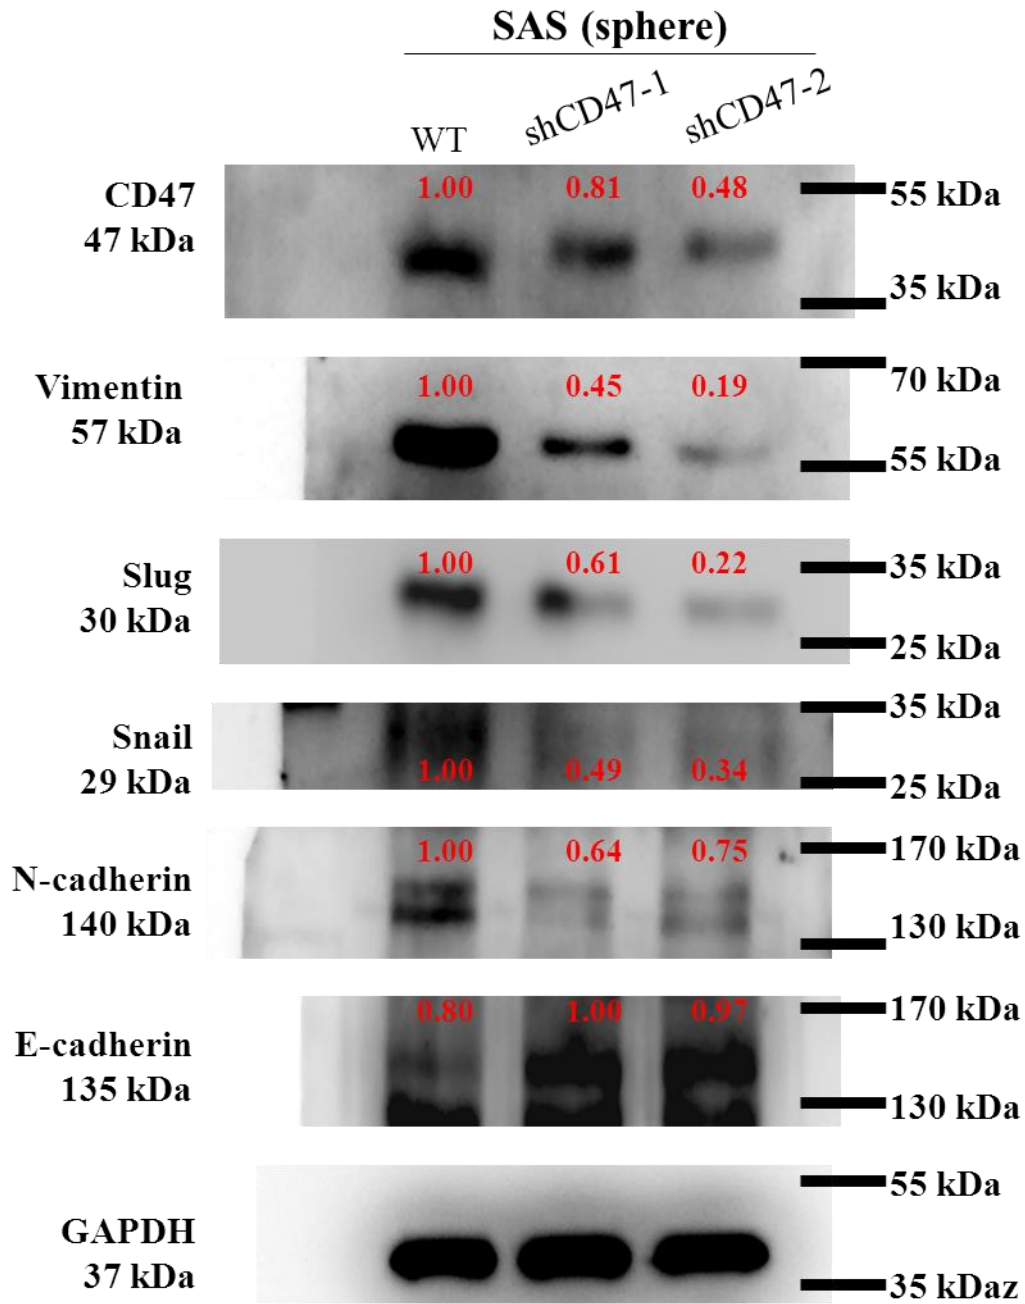

**Supplementary Figure S6.** Full-size blots of Figure 4D

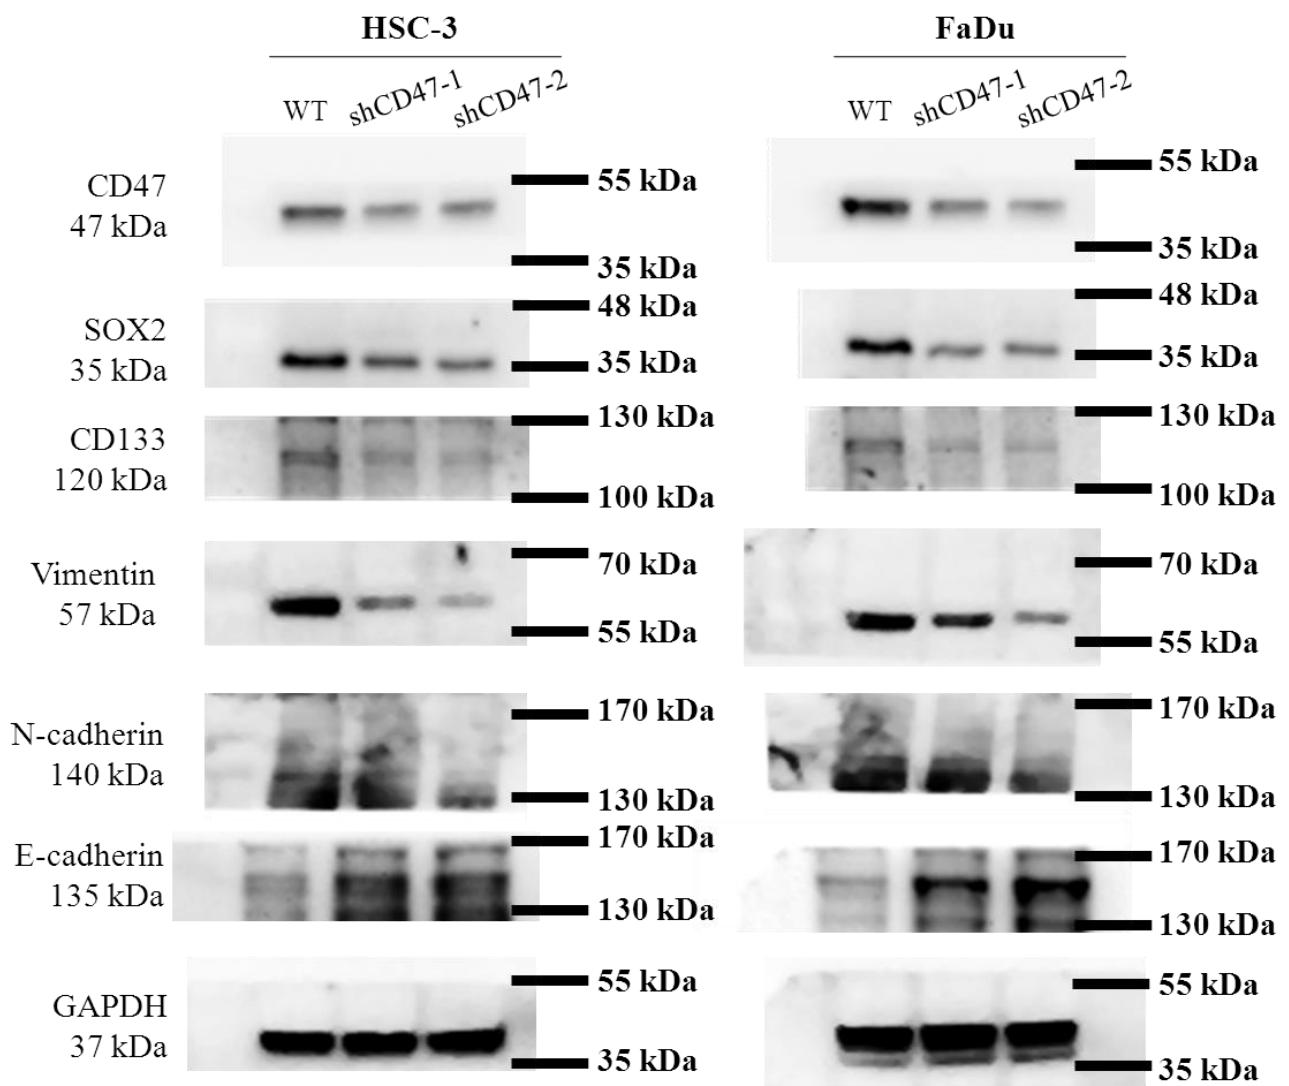

**Supplementary Figure S7.** Full-size blots of Figure S1
